# Supplementary material for: pH-Triggered Clustering Regulates β-sheet Activation in Silk Assembly
Source: Research Square preprint supplement (doi:10.21203/rs.3.rs-7495345/v1), 2025-09-17
Supplement: Supplementary file 1 [file 7264320aba52410cea79b01c.pdf]

# 1 pH-Triggered Clustering Regulates 2 $\beta$ -sheet Activation in Silk Assembly

3 Juanita Francis<sup>1,\*</sup>, Judith Houston<sup>2</sup>, Andrew Jackson<sup>2,3</sup>, Robert Dalglish<sup>4</sup>,  
4 Anne Martel<sup>5</sup>, Lionel Porcar<sup>5</sup>, Felix Roosen-Runge<sup>3</sup>, Cedric Dicko<sup>1,\*</sup>

5 <sup>1</sup>Division of Pure and Applied Biochemistry, Department of Chemistry, Lund University, Sweden

6 <sup>2</sup>European Spallation Source (ESS), Lund, Sweden

7 <sup>3</sup>Physical Chemistry, Department of Chemistry, Lund University, Sweden

8 <sup>4</sup>ISIS Neutron and Muon Source, STFC, Didcot, United Kingdom

9 <sup>5</sup>Institut Laue Langevin (ILL), Grenoble, France

---

\*Corresponding authors: [juanita.francis@tbiokem.lth.se](mailto:juanita.francis@tbiokem.lth.se), [cedric.dicko@tbiokem.lth.se](mailto:cedric.dicko@tbiokem.lth.se)

# 1 Supplementary Methods

## 1.1 Reconstituted silk fibroin solutions (RSF)

Reconstituted silk fibroin (RSF) was prepared from un-degummed *Bombyx mori* cocoons following established regeneration protocols<sup>1,2</sup>. Cocoons were cut into small squares and degummed for 1 h at 55 °C with magnetic stirring in 0.2 % w/v sodium carbonate ( $Na_2CO_3$ ). The degummed fibres were rinsed thoroughly, soaked in distilled water for 1 h, and air-dried overnight in a ventilated space. The dried silk fibres were dissolved in a 9 M lithium bromide (LiBr) at 70 °C (1 g silk per 10 mL LiBr) with gentle stirring until a clear solution formed ( $\sim 30$  min). The solution was cooled to room temperature, filtered through gauze into 12 kDa MWCO dialysis tubing (15–20 cm length, 2.5 cm diameter), and sealed securely with a string. Dialysis was performed at room temperature against 2 L of 10 mM sodium phosphate (NaP) buffer (pH 7.4) with four buffer changes evenly spaced over 3 days. Final RSF concentrations, determined gravimetrically after air drying aliquots of the dialysed solution, ranged from 30–50 mgml<sup>-1</sup>.

## 1.2 Small-angle neutron scattering

### 1.2.1 RSF solution preparation for SANS

The dialysed RSF solution in H<sub>2</sub>O was buffer-exchanged into 10 mM sodium phosphate (NaP) buffer (pH 7.4) prepared in D<sub>2</sub>O prior to NUrF experiments. Buffer exchange was performed using PD-10 desalting columns (GE Healthcare) pre-equilibrated with 25 mL H<sub>2</sub>O, followed by 25 mL D<sub>2</sub>O-based NaP buffer to remove preservatives. The RSF solution was applied to the column and eluted with 10 mM NaP buffer in D<sub>2</sub>O.

pH/pD measurements were made with a pH meter calibrated for H<sub>2</sub>O solutions. For D<sub>2</sub>O-based buffers, a typical offset of +0.4 units ( $pD = pH_{measured} + 0.4$ ) was not applied during preparation<sup>3</sup>.

Gelation was initiated by gently mixing the RSF solution with GdL to the desired final concentration or by adding methanol (15 % v/v) for methanol-induced gelation. Thioflavin T

(ThT) was included in all samples at 20  $\mu\text{M}$  to monitor  $\beta$ -sheet formation, as its fluorescence increases upon binding  $\beta$ -sheet-rich structures<sup>4</sup>. This concentration was chosen to balance sensitivity and minimise ThT-induced aggregation effects<sup>5</sup>. Each prepared sample had a final volume of 1 mL.

### 1.2.2 Sample preparation and instrument set-up

For each SANS measurement, 1 mL of RSF solution containing 20  $\mu\text{M}$  ThT was transferred into a 1.5 mL microfuge tube pre-loaded with GdL to reach the target final concentration. The mixture was gently inverted several times to fully dissolve the GdL while avoiding bubble formation. For methanol-induced gelation, methanol was added directly to the RSF solution to a final concentration of 15% (v/v), resulting in a final RSF concentration of 10  $\text{mgml}^{-1}$ .

A 750  $\mu\text{L}$  aliquot of the mixed sample was then transferred to a clean 1-mm path length four-window quartz cuvette (Cuvet-co, QS type). The cuvette was loaded into the NUrF sample environment and measured at 22  $^{\circ}\text{C}$ <sup>6</sup>. Supplementary Fig. 18 shows the optical and SANS layout of the NUrF system relative to the cuvette.

A delay time of  $\sim 5$  min ( $t_{\text{initial}}$ ) was recorded between initiating gelation (by GdL or methanol addition) and starting SANS measurements. Control experiments confirmed no significant scattering changes during this delay period (Supplementary Fig. S19).

SANS experiments were conducted on two occasions at the small-angle neutron diffractometer D22 (Institut Laue–Langevin, Grenoble, France) and once at SANS2D on Larmor (STFC ISIS Facility, Didcot, UK). Most data presented were collected during the first D22 visit, with subsequent experiments at ILL and ISIS used for validation.

For D22, measurements were performed using a neutron wavelength of 6  $\text{\AA}$  at sample–detector distances of 17.6 m and 1.4 m, covering a  $q$ -range of  $\sim 2 \times 10^{-2}$  - 0.5  $\text{\AA}^{-1}$ . The beam size was sufficiently large to ensure that any flocculation or precipitation did not influence the measured protein concentration, confirming that scattering signals arose from the protein within the beam path and not artefacts.

Integrated UV-visible spectroscopy was performed using a Flame TRX spectrometer (Ocean Insight) and a balanced deuterium halogen lamp. Fluorescence spectroscopy was carried out at

approximately  $\sim 90^\circ$  angles using a QEPro6500 spectrometer (Ocean Insight) and a high-power 280 nm LED (Thorlabs, at ISIS and ILL) or a 150 W xenon lamp with a Newport Cornerstone monochromator (at ILL).

### 1.2.3 Data reduction

Raw SANS data were processed and reduced to absolute intensity units using the GRASP software package (ILL, Grenoble)<sup>7</sup>. Standard corrections for background subtraction, transmission, and detector efficiency were applied according to instrument protocols.

## 1.3 SANS data analysis

Time-resolved SANS profiles were *log-log* transformed to improve scaling across structural length scales. Before model fitting, classical analysis was performed to evaluate overall structural changes during gelation. The scattering invariant ( $Q^*$ ) was calculated at each time point by integrating  $I(q) \cdot q^2$  over the measured  $q$ -range:

$$Q^* = \int_{q_{\min}}^{q_{\max}} I(q) \cdot q^2 dq \quad (1)$$

where  $I(q)$  is the measured scattering intensity and  $q$  is the scattering vector. This provided a model-independent measure of total density fluctuations during gelation.

The correlation peak position ( $q^+$ ) was determined by identifying the most prominent local maximum in  $I(q)$  above a defined intensity threshold within the measured  $q$ -range. Together, these analyses provided initial insights into evolving network formation and characteristic length scales.

To extract quantitative structural parameters, time-resolved SANS profiles were fitted using a sequential two-function approach. The first function (Equation 2) combined:

- a power-law term,  $\frac{a}{q^n}$ , describing large-scale gel-like fractal networks,
- a Lorentzian term,  $\frac{c}{1+(\eta q)^m}$ , describing scattering from correlated domains of size  $\eta$ , and
- a constant background (b), representing incoherent scattering.



$$I(q) = \underbrace{\frac{a}{q^n}}_{\text{Power law}} + \underbrace{\frac{c}{1 + (\eta q)^m}}_{\text{Lorentzian}} + b \quad (2)$$

This function provided initial parameter estimates for the second function (Equation 3), which incorporated:

- a modulated power-law with exponential cut-off,  $\frac{a}{q^n}e^{-(\eta q)^m}$ , to capture finite-size effects at low  $q$ , and
- a Gaussian term,  $d, e^{-\frac{(q-q_0)^2}{2\sigma^2}}$ , to describe emerging correlation peaks.

$$I(q) = \underbrace{\frac{a}{q^n}e^{-(\eta q)^m}}_{\text{Power law with cut-off}} + \underbrace{\frac{c}{1 + (\eta q)^m}}_{\text{Lorentzian}} + \underbrace{de^{-\frac{(q-q_0)^2}{2\sigma^2}}}_{\text{Gaussian}} + b \quad (3)$$

Fitted parameters included  $a$  (low- $q$  intensity,  $\text{cm}^{-1}$ ),  $n$  (gel fractal exponent),  $c$  (Lorentzian amplitude,  $\text{cm}^{-1}$ ),  $\eta$  (correlation length,  $\text{\AA}$ ),  $m$  (internal fractal exponent),  $d$  (Gaussian amplitude,  $\text{cm}^{-1}$ ),  $q_0$  (Gaussian center,  $\text{\AA}^{-1}$ ),  $\sigma$  (Gaussian width,  $\text{\AA}^{-1}$ ), A constant background term  $b$  ( $\text{cm}^{-1}$ ), was also included. The physical interpretations of the fitted parameters are summarised in Table S1.

All GdL-induced samples were analysed using this two-step approach. Methanol-induced samples were fitted only using Equation 2, as inclusion of additional terms from Equation 3 led to overfitting without improving fit quality.

### 1.3.1 DBSCAN clustering of model parameters

The full eight-dimensional parameter set  $(a, n, c, \eta, m, d, q_0, \sigma)$  obtained from time-resolved SANS fits was standardized (Z-score) and subjected to Density-Based Spatial Clustering of Applications with Noise (DBSCAN;  $\text{eps} = 1.0$  (the maximum distance between two points to be considered neighbors), minimum samples per cluster core = 5) to identify discrete gelation phases. Clusters were assigned to initiation, pre-assembly, network assembly and maturation based on their dominant time-point distributions. For visualisation, the highest-correlation subspace  $(n, m, d)$  was projected into 3D, with convex-hull surfaces delineating each phase envelope.

## 1.4 Optical spectroscopy data analysis

In addition to SANS measurements, fluorescence data were collected to monitor physicochemical changes during RSF gelation. Two signals were analysed: the Thioflavin T (ThT) emission peak at 485 nm, which reports on  $\beta$ -sheet formation, and the fluorescence excitation signal at 450 nm, used here as a proxy for turbidity. Normally, turbidity would be measured directly via UV-visible absorption at 450 nm; however, data saving issues on the integrated UV spectrometer and rapid signal saturation precluded its use in this study. Instead, changes in the 450 nm fluorescence emission signal were used to approximate turbidity.

The ThT fluorescence kinetics were fitted to a sigmoidal function (Eq. 4) to extract the onset time ( $ThT_{on}$ ) and midpoint time ( $ThT_m$ ) of the fluorescence increase:

$$I(t) = A \cdot \left(1 + e^{-\frac{t-ThT_m}{\tau}}\right)^{-1} + I_0 \quad (4)$$

Here,  $I(t)$  is the fluorescence intensity at time  $t$ ;  $A$  is the amplitude (maximum fluorescence increase);  $I_0$  is the baseline intensity;  $ThT_m$  is the midpoint of the transition; and  $\tau$  is the characteristic time scale.

The onset time,  $ThT_{on}$ , was defined as the point at which the fitted curve reaches approximately 12 % of the total amplitude  $A$ , corresponding to two time constants ( $2\tau$ ) before  $ThT_m$ .

## 1.5 Component and correlation analysis

### 1.5.1 Component analysis

The multi-curve component analysis leveraged the strength of simultaneously collected SANS and fluorescence data. We implemented the multivariate curve resolution–alternating least squares (MCR-ALS) algorithm on a row-augmented data matrix<sup>8,9</sup>, where each row represented a time point and columns corresponded to SANS and ThT fluorescence emission signals.

134 Before analysis, the data were normalised to their respective maximum intensities. SANS  
135 profiles were *log-log* transformed, while fluorescence data were despiked using a median filter  
136 and smoothed with a Savitzky–Golay filter. Running MCR-ALS yielded a decomposition into  
137 component spectra and their associated concentration profiles over time.

138 Further details of singular value decomposition (SVD), initial component estimation, and  
139 rotational ambiguity assessment are provided in the supplementary information.

### 140 1.5.2 Correlation analysis

141 Time-resolved fitted-parameter series, ThT fluorescence and turbidity traces, and concentra-  
142 tion profiles for Components 1–3 were concatenated in a common data matrix after min–max  
143 normalisation and truncation to the shortest series length. Pairwise Pearson correlation coeffi-  
144 cients were calculated between each component profile and each of the ten variables, yielding  
145 a  $3 \times 10$  correlation table. Visualisation employed a linear colourmap spanning  $-1$  to  $+1$ ,  
146 with marker area scaled by  $|r|$  and hue indicating correlation sign; subtle gridlines and axis  
147 inversion positioned Component 3 at the top for consistency.

## 2 Supplementary Figures

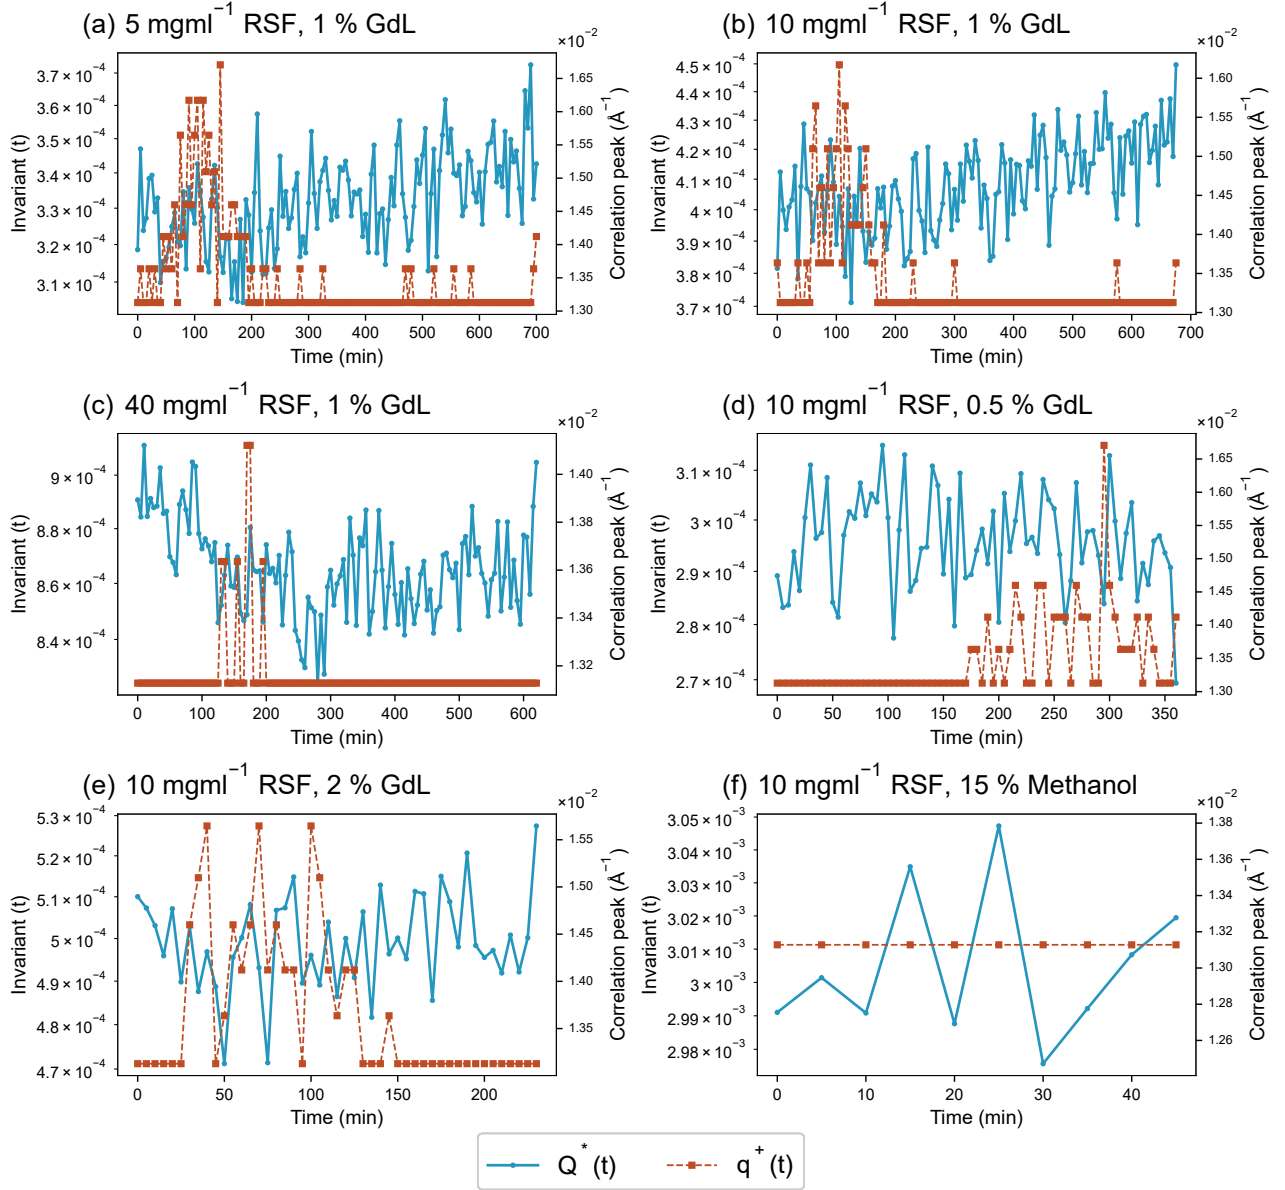

**Figure S1. Time-resolved evolution of scattering invariant ( $Q^*$ ) and correlation peak ( $q_0$ ) during RSF gelation across conditions.** Panels show  $Q^*$  (black solid lines, left y-axis) and fitted correlation peak position  $q_0$  (red dashed lines, right y-axis) over time for six RSF gelation conditions: (a) 5 mgmL<sup>-1</sup> RSF, 1 % GdL; (b) 10 mgmL<sup>-1</sup> RSF, 1 % GdL; (c) 40 mgmL<sup>-1</sup> RSF, 1 % GdL; (d) 10 mgmL<sup>-1</sup> RSF, 0.5 % GdL; (e) 10 mgmL<sup>-1</sup> RSF, 2 % GdL; and (f) 10 mgmL<sup>-1</sup> RSF, 15 % methanol. Traces highlight concentration- and trigger-dependent differences in mesoscale structure evolution.

(a) 0.5 % GdL

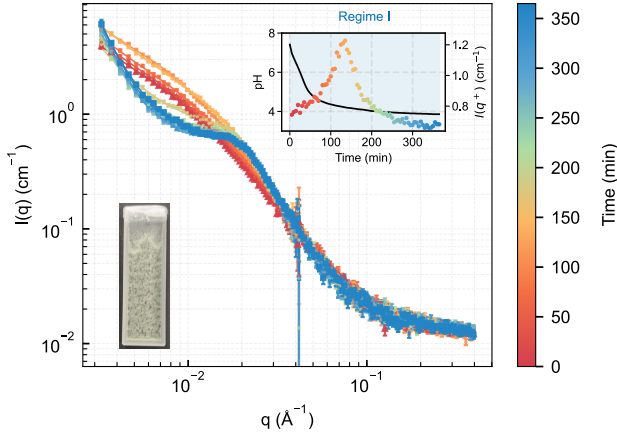

(c) 2 % GdL

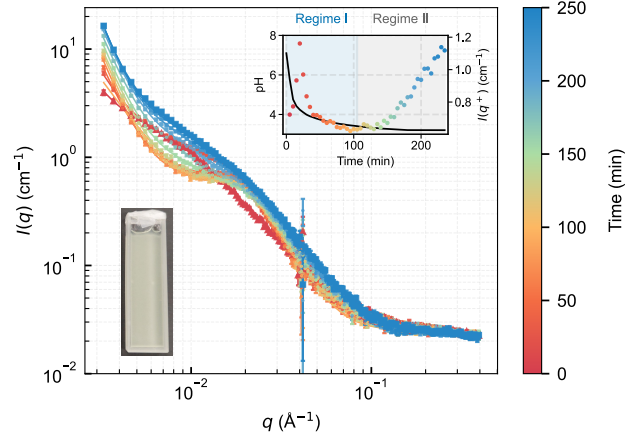

**Figure S2.** Absolute SANS scattering intensities over time for  $10 \text{ mgml}^{-1}$  RSF induced with three different GdL concentrations until gelation. Panels show RSF buffer-exchanged with  $\text{D}_2\text{O}$  as the solvent and induced at  $t_{\text{initial}} = 5 \text{ min}$  with (a) 0.5 % GdL (b) 1 % GdL and (c) 2 % GdL. Measurements were taken at 5-min intervals and continued until gelation or completion of the run. Images of each sample in the cuvette after the SANS experiment are shown within the respective panels. The colour bar indicates the time elapsed since induction for each SANS measurement.

(a) [RSF]

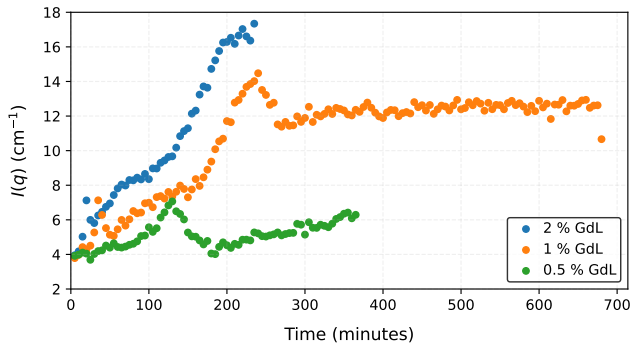

(b) [GdL]

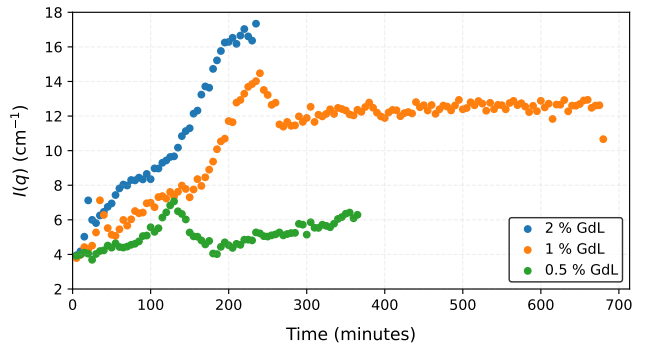

**Figure S3.** Absolute scattering intensity at fixed low- $q = 3.27 \times 10^{-3} \text{ \AA}^{-1}$ . Time-resolved scattering intensities of RSF in  $\text{D}_2\text{O}$  at (a) 5, 10, and 40 mg/mL RSF, each triggered with 1 % (w/v) GdL, and (b) 1 mg/mL RSF triggered with 0.5, 1, and 2 % (w/v) GdL. In all cases, measurements began at  $t_{\text{initial}} = 5 \text{ min}$  and continued at 5-minute intervals until gelation.

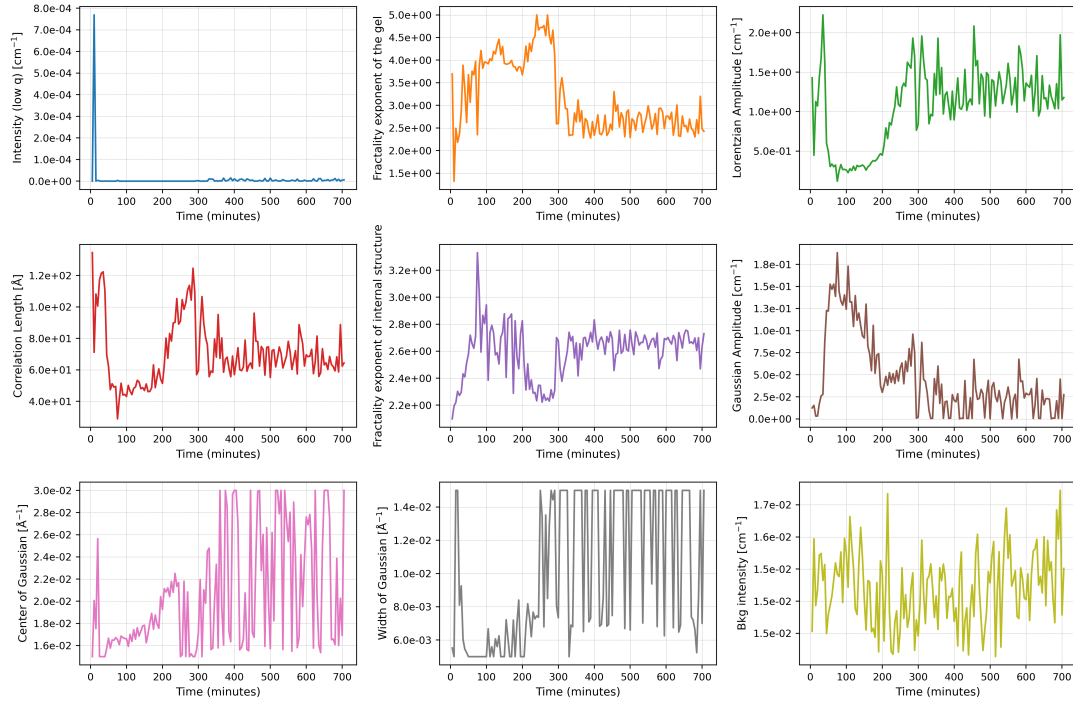

**Figure S4. Time evolution of SANS fitting parameters during RSF gelation for 5 mgml<sup>-1</sup> RSF with 1 % (w/v) GdL.** Nine fitting parameters extracted from time-resolved SANS data using the two-step composite model: (top row, left to right) (1) low- $q$  intensity  $a$ ; (2) power-law exponent  $n$  (gel network fractal dimension); (3) Lorentzian amplitude  $c$ ; (middle row) (4) Lorentzian correlation length  $\eta$ ; (5) internal structure exponent  $m$ ; (6) Gaussian amplitude  $d$ ; (bottom row) (7) Gaussian center  $q_0$ ; (8) Gaussian width  $\sigma$ ; (9) incoherent background intensity  $b$ .

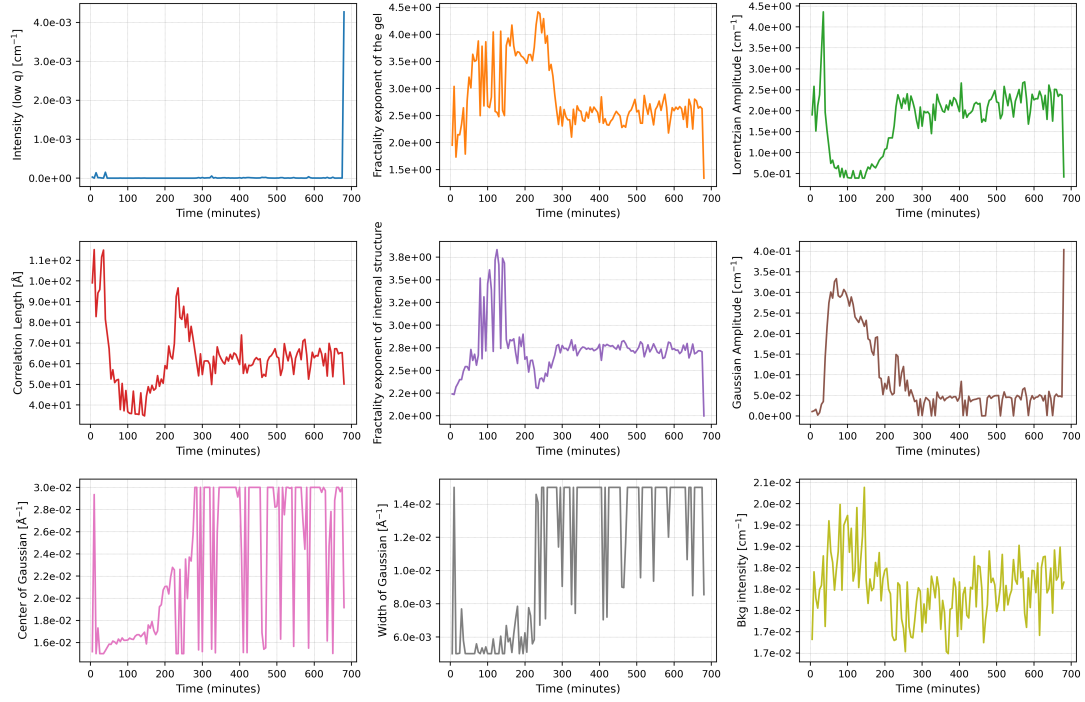

**Figure S5. Time evolution of SANS fitting parameters during RSF gelation for 10 mgml<sup>-1</sup> RSF with 1 % (w/v) GdL.** Nine fitting parameters extracted from time-resolved SANS data using the two-step composite model: (top row, left to right) (1) low- $q$  intensity  $a$ ; (2) power-law exponent  $n$  (gel network fractal dimension); (3) Lorentzian amplitude  $c$ ; (middle row) (4) Lorentzian correlation length  $\eta$ ; (5) internal structure exponent  $m$ ; (6) Gaussian amplitude  $d$ ; (bottom row) (7) Gaussian center  $q_0$ ; (8) Gaussian width  $\sigma$ ; (9) incoherent background intensity  $b$ .

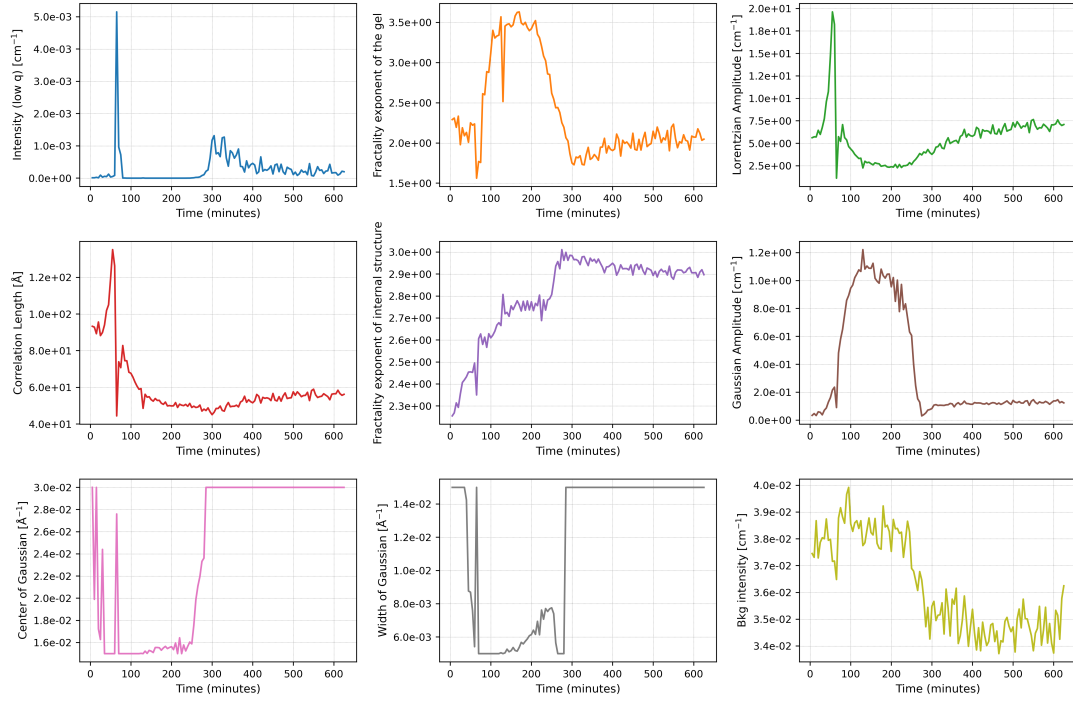

**Figure S6. Time evolution of SANS fitting parameters during RSF gelation for 40 mgml<sup>-1</sup> RSF with 1 % (w/v) GdL.** Nine fitting parameters extracted from time-resolved SANS data using the two-step composite model: (top row, left to right) (1) low- $q$  intensity  $a$ ; (2) power-law exponent  $n$  (gel network fractal dimension); (3) Lorentzian amplitude  $c$ ; (middle row) (4) Lorentzian correlation length  $\eta$ ; (5) internal structure exponent  $m$ ; (6) Gaussian amplitude  $d$ ; (bottom row) (7) Gaussian center  $q_0$ ; (8) Gaussian width  $\sigma$ ; (9) incoherent background intensity  $b$ .



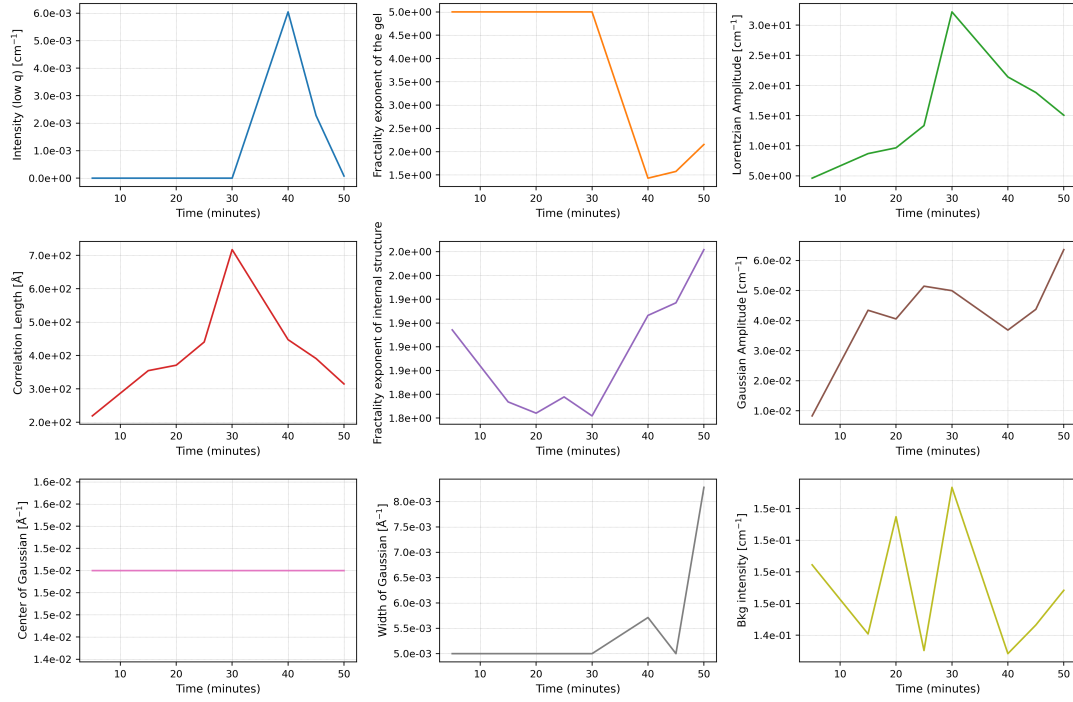

**Figure S7. Time evolution of SANS fitting parameters during RSF gelation for 10 mgml<sup>-1</sup> RSF with 15 % methanol.** Nine fitting parameters extracted from time-resolved SANS data using the two-step composite model: (top row, left to right) (1) low- $q$  intensity  $a$ ; (2) power-law exponent  $n$  (gel network fractal dimension); (3) Lorentzian amplitude  $c$ ; (middle row) (4) Lorentzian correlation length  $\eta$ ; (5) internal structure exponent  $m$ ; (6) Gaussian amplitude  $d$ ; (bottom row) (7) Gaussian center  $q_0$ ; (8) Gaussian width  $\sigma$ ; (9) incoherent background intensity  $b$ .

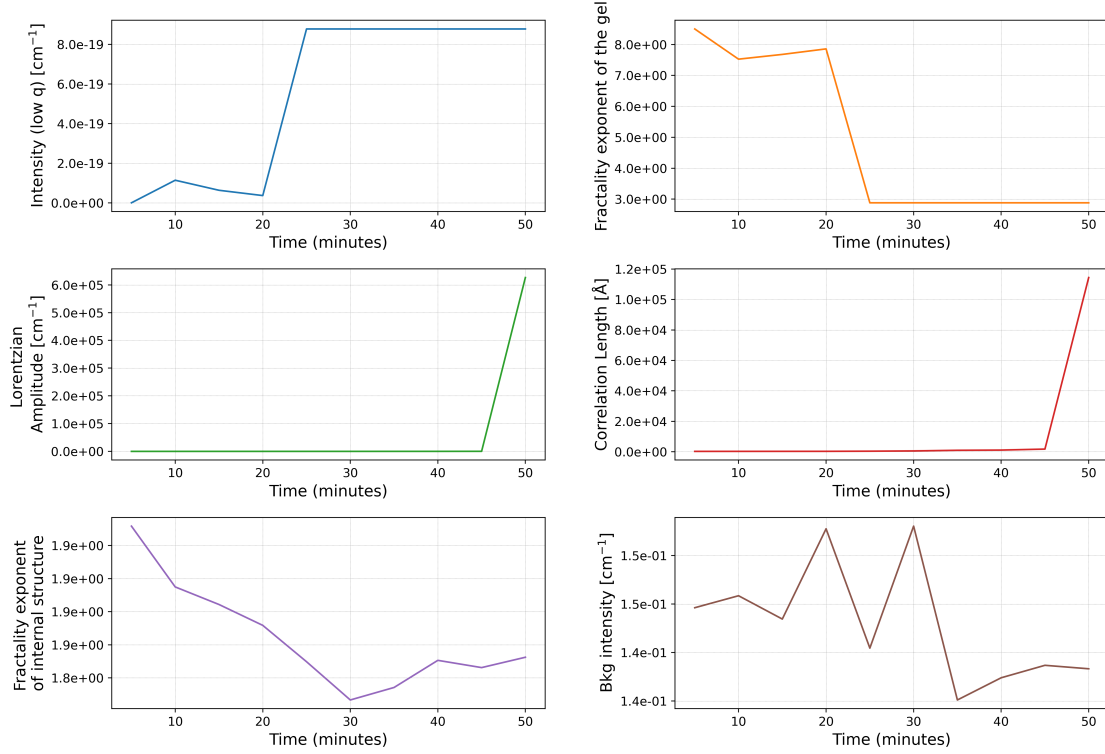

**Figure S8. Time evolution of SANS fitting parameters during RSF gelation for 10  $\text{mg ml}^{-1}$  RSF with 15 % methanol.** Six fitting parameters extracted from time-resolved SANS data using the one step model containing the power-law and Lorentzian terms: (top row, left to right) (1) low- $q$  intensity  $a$ ; (2) power-law exponent  $n$  (gel network fractal dimension); (middle row) (3) Lorentzian amplitude  $c$ ; (4) Lorentzian correlation length  $\eta$ ; (bottom row) (5) internal structure exponent  $m$ ; (6) incoherent background intensity  $b$ .

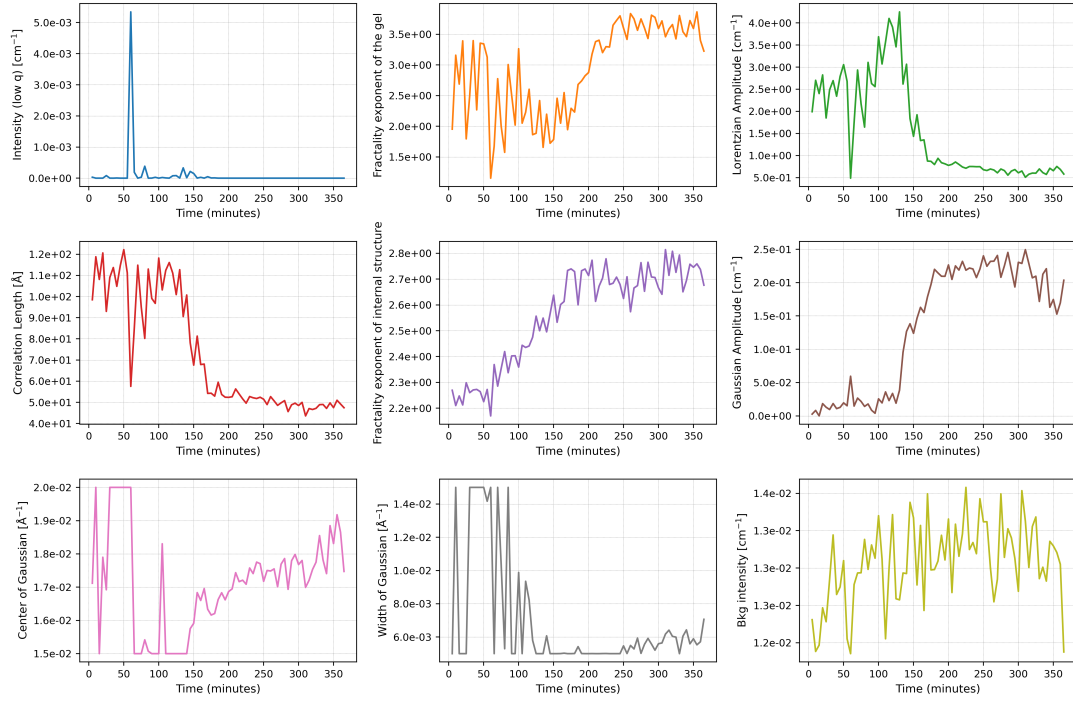

**Figure S9. Time evolution of SANS fitting parameters during RSF gelation for 10  $\text{mg ml}^{-1}$  RSF with 0.5 % (w/v) GdL.** Nine fitting parameters extracted from time-resolved SANS data using the two-step composite model: (top row, left to right) (1) low- $q$  intensity  $a$ ; (2) power-law exponent  $n$  (gel network fractal dimension); (3) Lorentzian amplitude  $c$ ; (middle row) (4) Lorentzian correlation length  $\eta$ ; (5) internal structure exponent  $m$ ; (6) Gaussian amplitude  $d$ ; (bottom row) (7) Gaussian center  $q_0$ ; (8) Gaussian width  $\sigma$ ; (9) incoherent background intensity  $b$ .

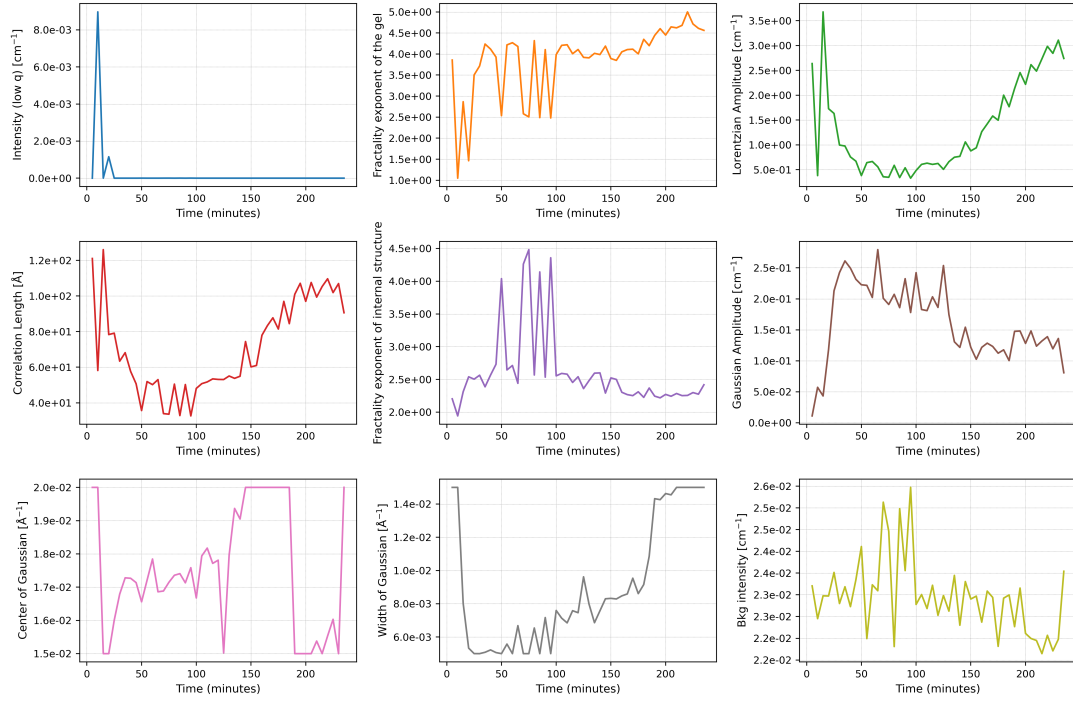

**Figure S10. Time evolution of SANS fitting parameters during RSF gelation for 10  $\text{mg ml}^{-1}$  RSF with 2 % (w/v) GdL.** Nine fitting parameters extracted from time-resolved SANS data using the two-step composite model: (top row, left to right) (1) low- $q$  intensity  $a$ ; (2) power-law exponent  $n$  (gel network fractal dimension); (3) Lorentzian amplitude  $c$ ; (middle row) (4) Lorentzian correlation length  $\eta$ ; (5) internal structure exponent  $m$ ; (6) Gaussian amplitude  $d$ ; (bottom row) (7) Gaussian center  $q_0$ ; (8) Gaussian width  $\sigma$ ; (9) incoherent background intensity  $b$ .

(a) 5 mgml<sup>-1</sup> RSF, 1 % GdL

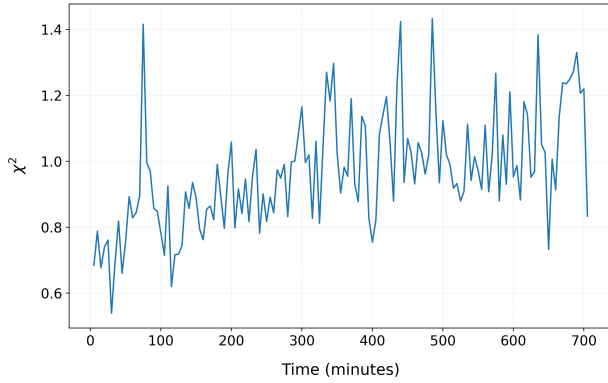

(b) 10 mgml<sup>-1</sup> RSF, 1 % GdL

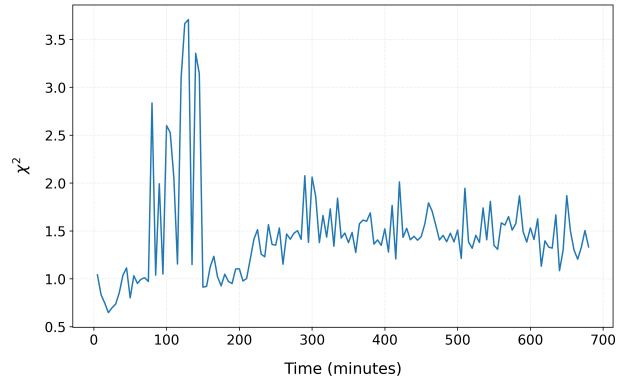

(c) 40 mgml<sup>-1</sup> RSF, 1 % GdL

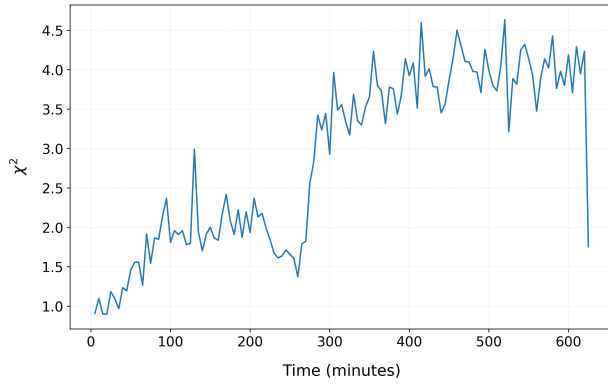

(d) 10 mgml<sup>-1</sup> RSF, 0.5 % GdL

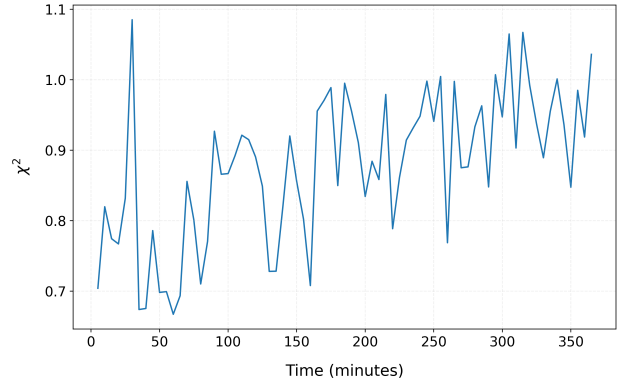

(e) 10 mgml<sup>-1</sup> RSF, 2 % GdL

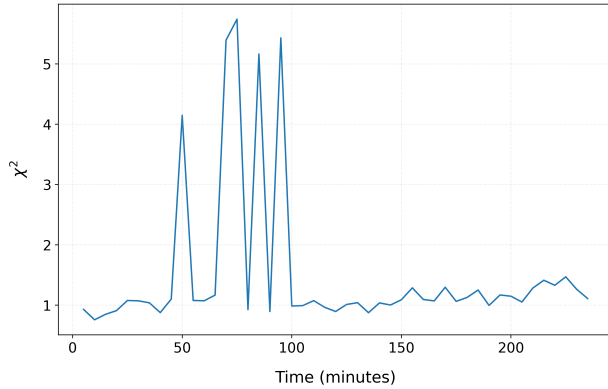

(f) 10 mgml<sup>-1</sup> RSF, 15 % Methanol

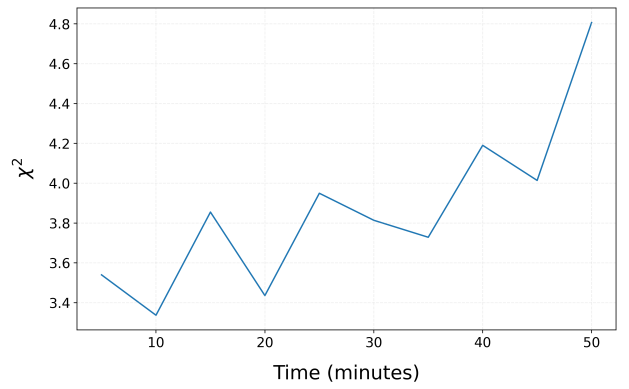

**Figure S11. Evolution of fit residuals during RSF gelation.** Reduced chi-square values ( $\chi^2$ ) from two-step SANS model fitting as a function of time, indicating the reliability of the model fits throughout the structural evolution of RSF at varying conditions. Samples shown are: (a) 5 mgml<sup>-1</sup> RSF, 1 % GdL; (b) 10 mgml<sup>-1</sup> RSF, 1 % GdL; (c) 40 mgml<sup>-1</sup> RSF, 1 % GdL; (d) 10 mgml<sup>-1</sup> RSF, 0.5 % GdL; (e) 10 mgml<sup>-1</sup> RSF, 2 % GdL; and 10 mgml<sup>-1</sup> RSF, 15 % methanol (one-step model fit).

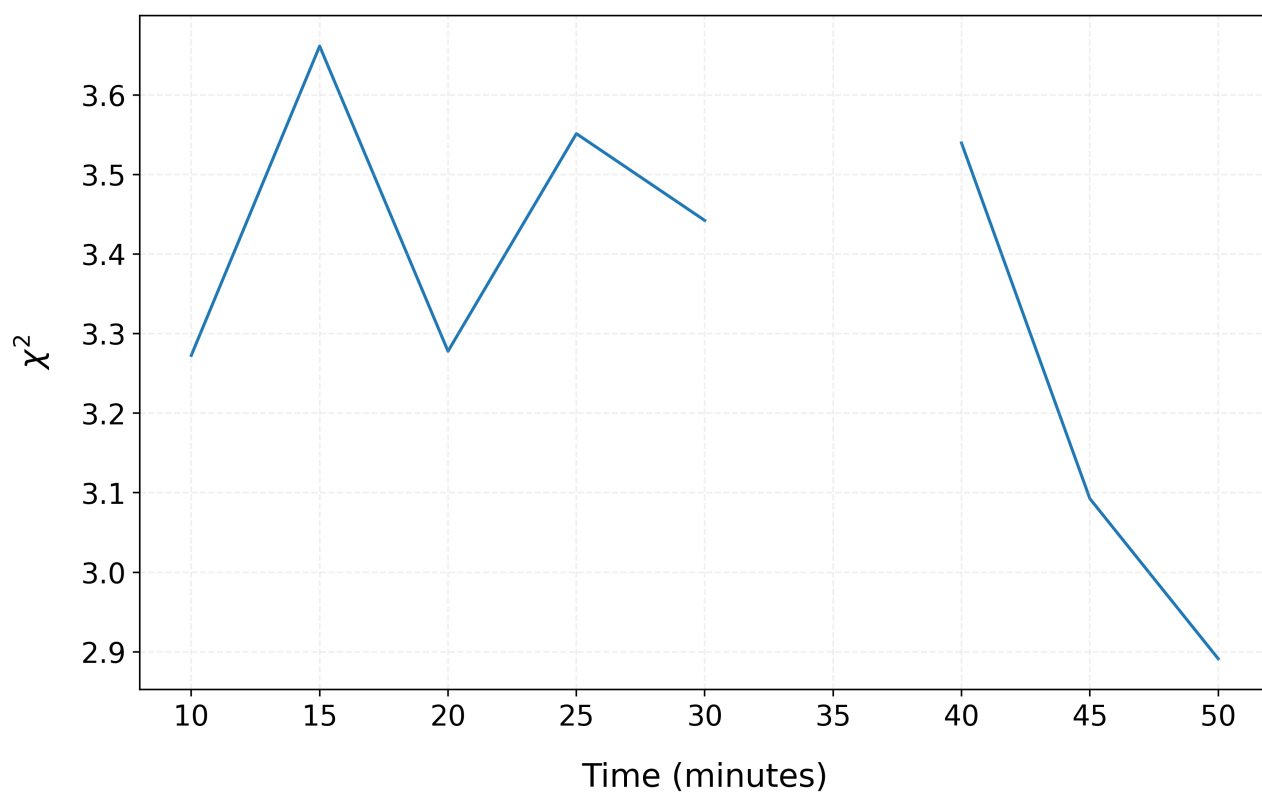

**Figure S12. Evolution of fit residuals during RSF gelation for 10 mgml<sup>-1</sup> RSF, 15 % methanol using two-step SANS model fit.** Reduced chi-square values ( $\chi^2$ ) are plotted as a function of time, indicating the reliability of the model fits throughout the structural evolution of RSF.

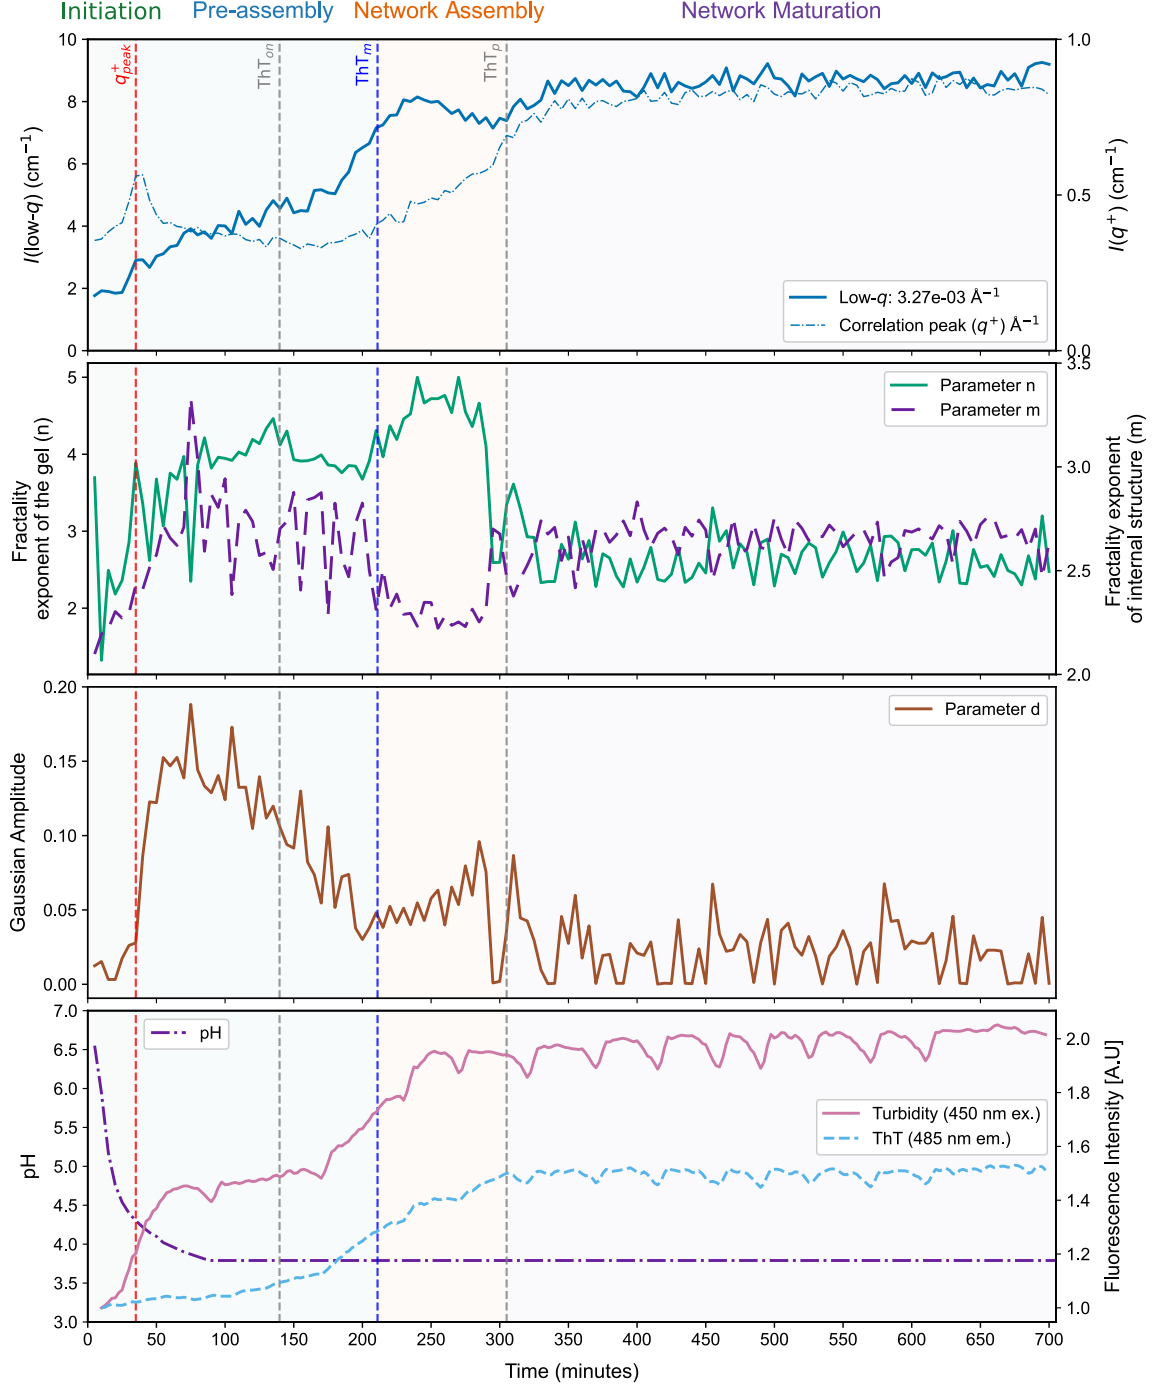

**Figure S13. Time-resolved NUrF analysis of RSF gelation at 5 mg/mL with 1 % (w/v) GdL.** Model-free SANS metrics, low- $q$  (blue solid) and the correlation peak  $q^+$  (blue dash) intensities were plotted every 5 min from  $t_{\text{initial}} = 5$  min in the top panel. The middle two panels show structural parameters extracted by fitting the hierarchical composite model to each SANS curve: network fractal exponent  $n$  (green), internal-structure exponent  $m$  (purple, dashed), and Gaussian amplitude  $d$  (brown). The bottom panel displays pH (purple, dash-dots; offline, every 6 s), turbidity at 450 nm excitation (pink) and ThT fluorescence at 485 nm emission (light-blue, dashed; every 2.5 min). Vertical dashed lines mark the correlation peak maximum intensity ( $I(q^+)$ , red), ThT onset ( $\text{ThT}_{\text{on}}$ , grey), mid-point ( $\text{ThT}_m$ , blue) and ThT plateau ( $\text{ThT}_p$ , grey). The colored shaded regions infer gelation stages: Initiation (green), Pre-assembly (blue), Network Assembly (orange) and Network maturation (purple).

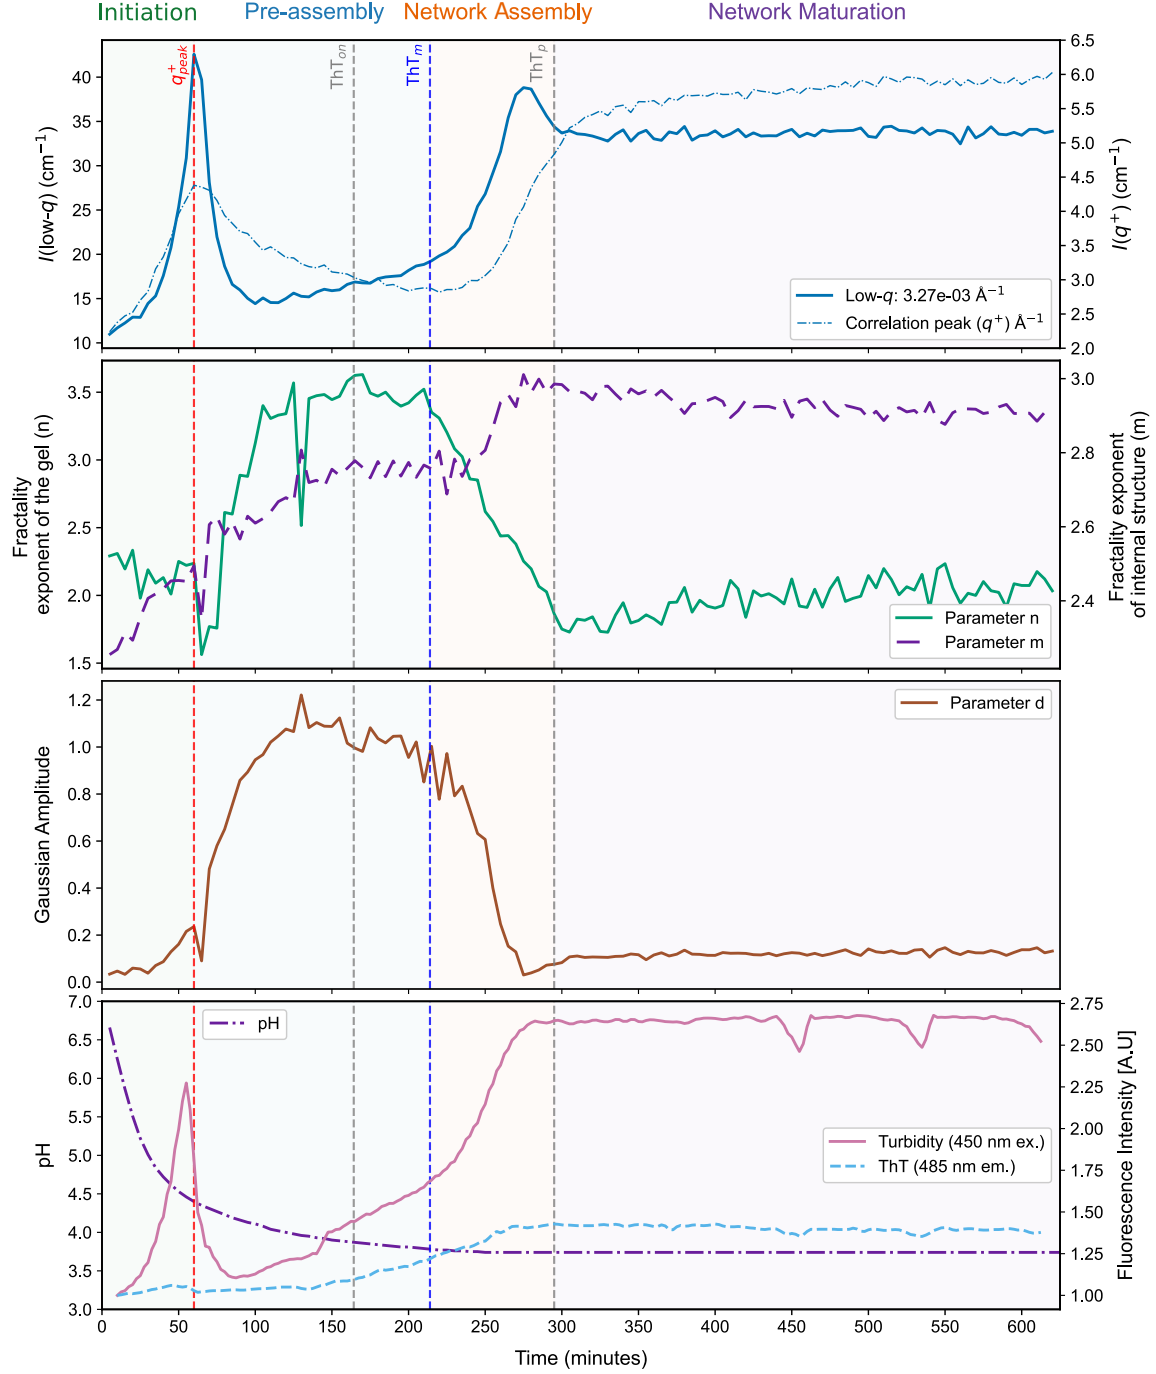

**Figure S14. Time-Resolved NUrF analysis of RSF gelation at 40 mgml<sup>-1</sup> with 1 % (w/v) GdL.** Model-free SANS metrics, low- $q$  (blue solid) and the correlation peak  $q^+$  (blue dash) intensities were plotted ever 5 min from  $t_{\text{initial}} = 5$  min in the top panel. The middle two panels show structural parameters extracted by fitting the hierarchical composite model to each SANS curve: network fractal exponent  $n$  (green), internal-structure exponent  $m$  (purple, dashed), and Gaussian amplitude  $d$  (brown). The bottom panel displays pH (purple, dash-dots; offline, every 6 s), turbidity at 450 nm excitation (pink) and ThT fluorescence at 485 nm emission (light-blue, dashed; every 2.5 min). Vertical dashed lines mark the correlation peak maximum intensity ( $I(q^+)$ , red), ThT onset ( $\text{ThT}_{\text{on}}$ , grey), mid-point ( $\text{ThT}_m$ , blue) and ThT plateau ( $\text{ThT}_p$ , grey). The colored shaded regions infer gelation stages: Initiation (green), Pre-assembly (blue), Network Assembly (orange) and Network maturation (purple).



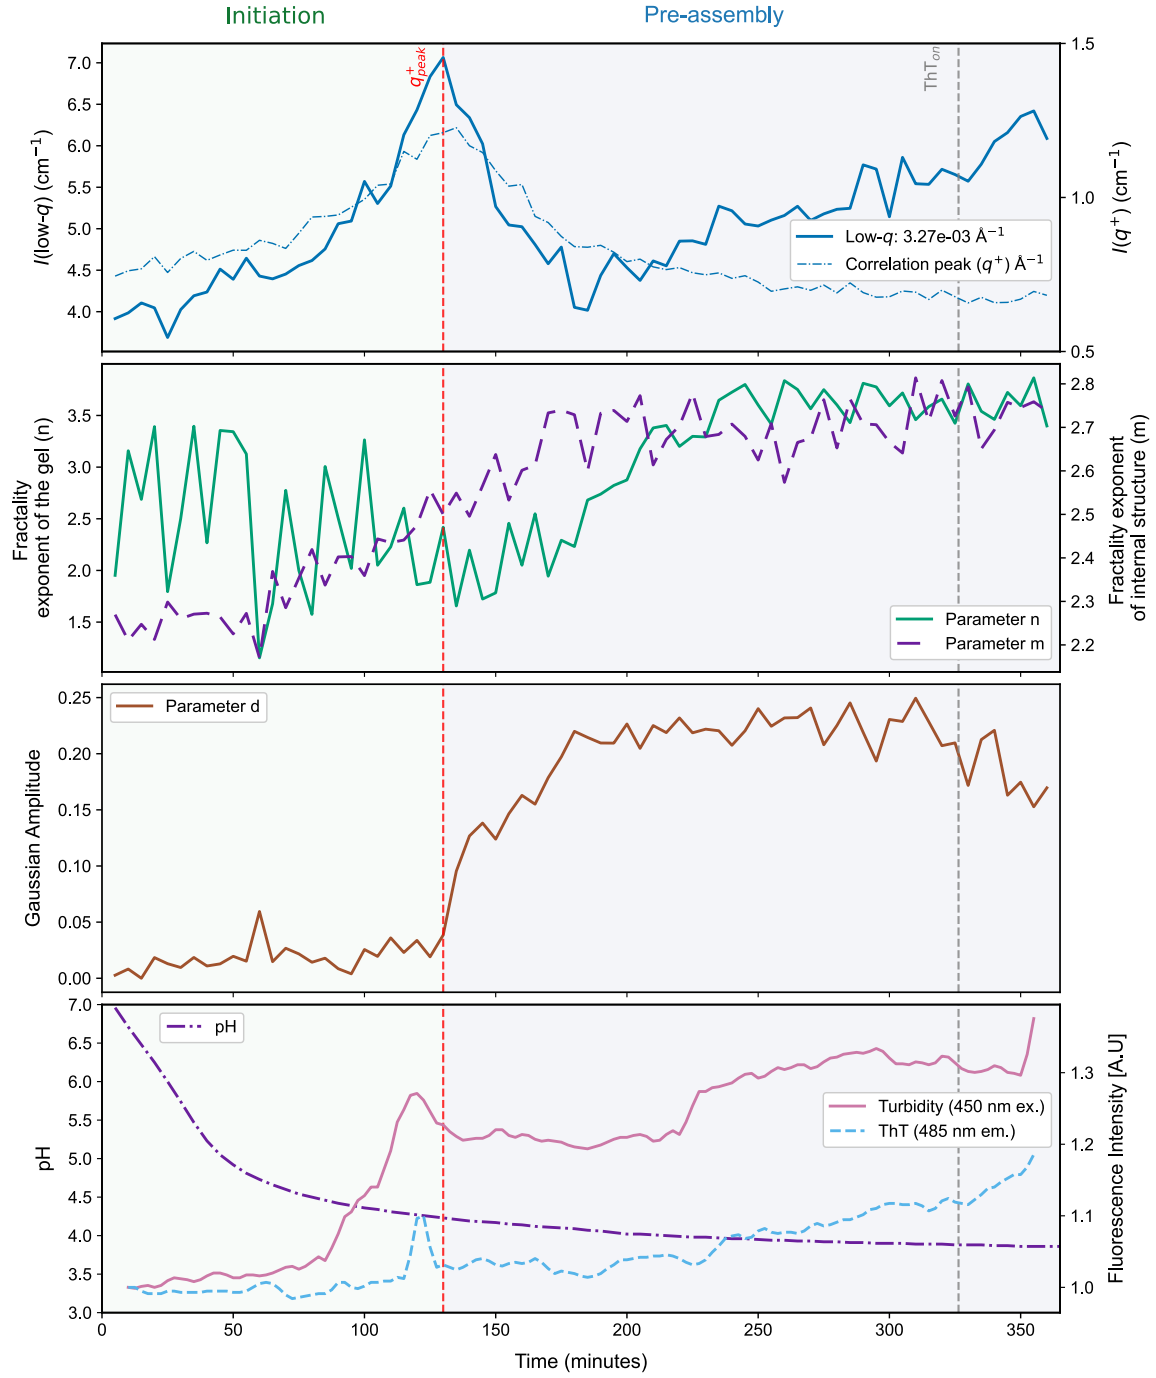

**Figure S15. Time-Resolved NUrF analysis of RSF gelation at 10 mgml<sup>-1</sup> with 0.5 % (w/v) GdL.** Model-free SANS metrics, low- $q$  (blue solid) and the correlation peak  $q^+$  (blue dash) intensities were plotted ever 5 min from  $t_{\text{initial}} = 5$  min in the top panel. The middle two panels show structural parameters extracted by fitting the hierarchical composite model to each SANS curve: network fractal exponent  $n$  (green), internal-structure exponent  $m$  (purple, dashed), and Gaussian amplitude  $d$  (brown). The bottom panel displays pH (purple, dash-dots; offline, every 6 s), turbidity at 450 nm excitation (pink) and ThT fluorescence at 485 nm emission (light-blue, dashed; every 2.5 min). Vertical dashed lines mark the correlation peak maximum intensity ( $I(q^+)$ , red) and ThT onset (ThT<sub>on</sub>, grey). The colored shaded regions infer gelation stages: Initiation (green), Pre-assembly (blue).

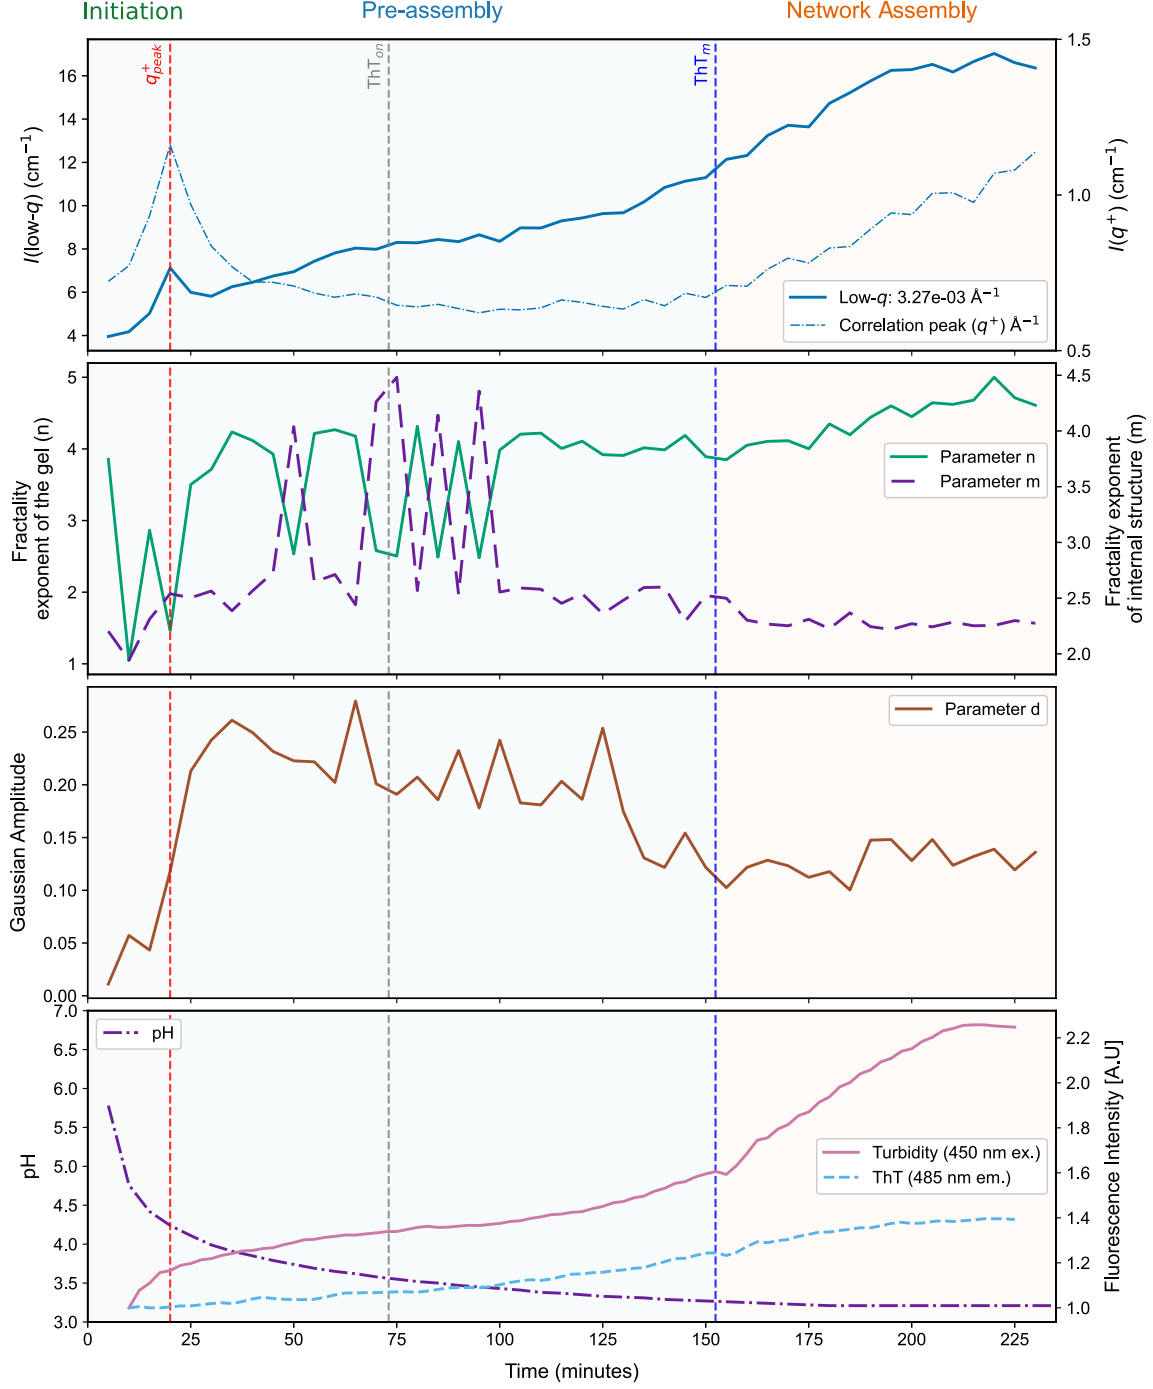

**Figure S16. Time-Resolved NUrF analysis of RSF gelation at 10 mgml<sup>-1</sup> with 2 % (w/v) GdL.** Model-free SANS metrics, low- $q$  (blue solid) and the correlation peak  $q^+$  (blue dash) intensities were plotted ever 5 min from  $t_{\text{initial}} = 5$  min in the top panel. The middle two panels show structural parameters extracted by fitting the hierarchical composite model to each SANS curve: network fractal exponent  $n$  (green), internal-structure exponent  $m$  (purple, dashed), and Gaussian amplitude  $d$  (brown). The bottom panel displays pH (purple, dash-dots; offline, every 6 s), turbidity at 450 nm excitation (pink) and ThT fluorescence at 485 nm emission (light-blue, dashed; every 2.5 min). Vertical dashed lines mark the correlation peak maximum intensity ( $I(q^+)$ , red), ThT onset ( $\text{ThT}_{\text{on}}$ , grey) and mid-point ( $\text{ThT}_m$ , blue). The colored shaded regions infer gelation stages: Initiation (green), Pre-assembly (blue), and Network Assembly (orange).

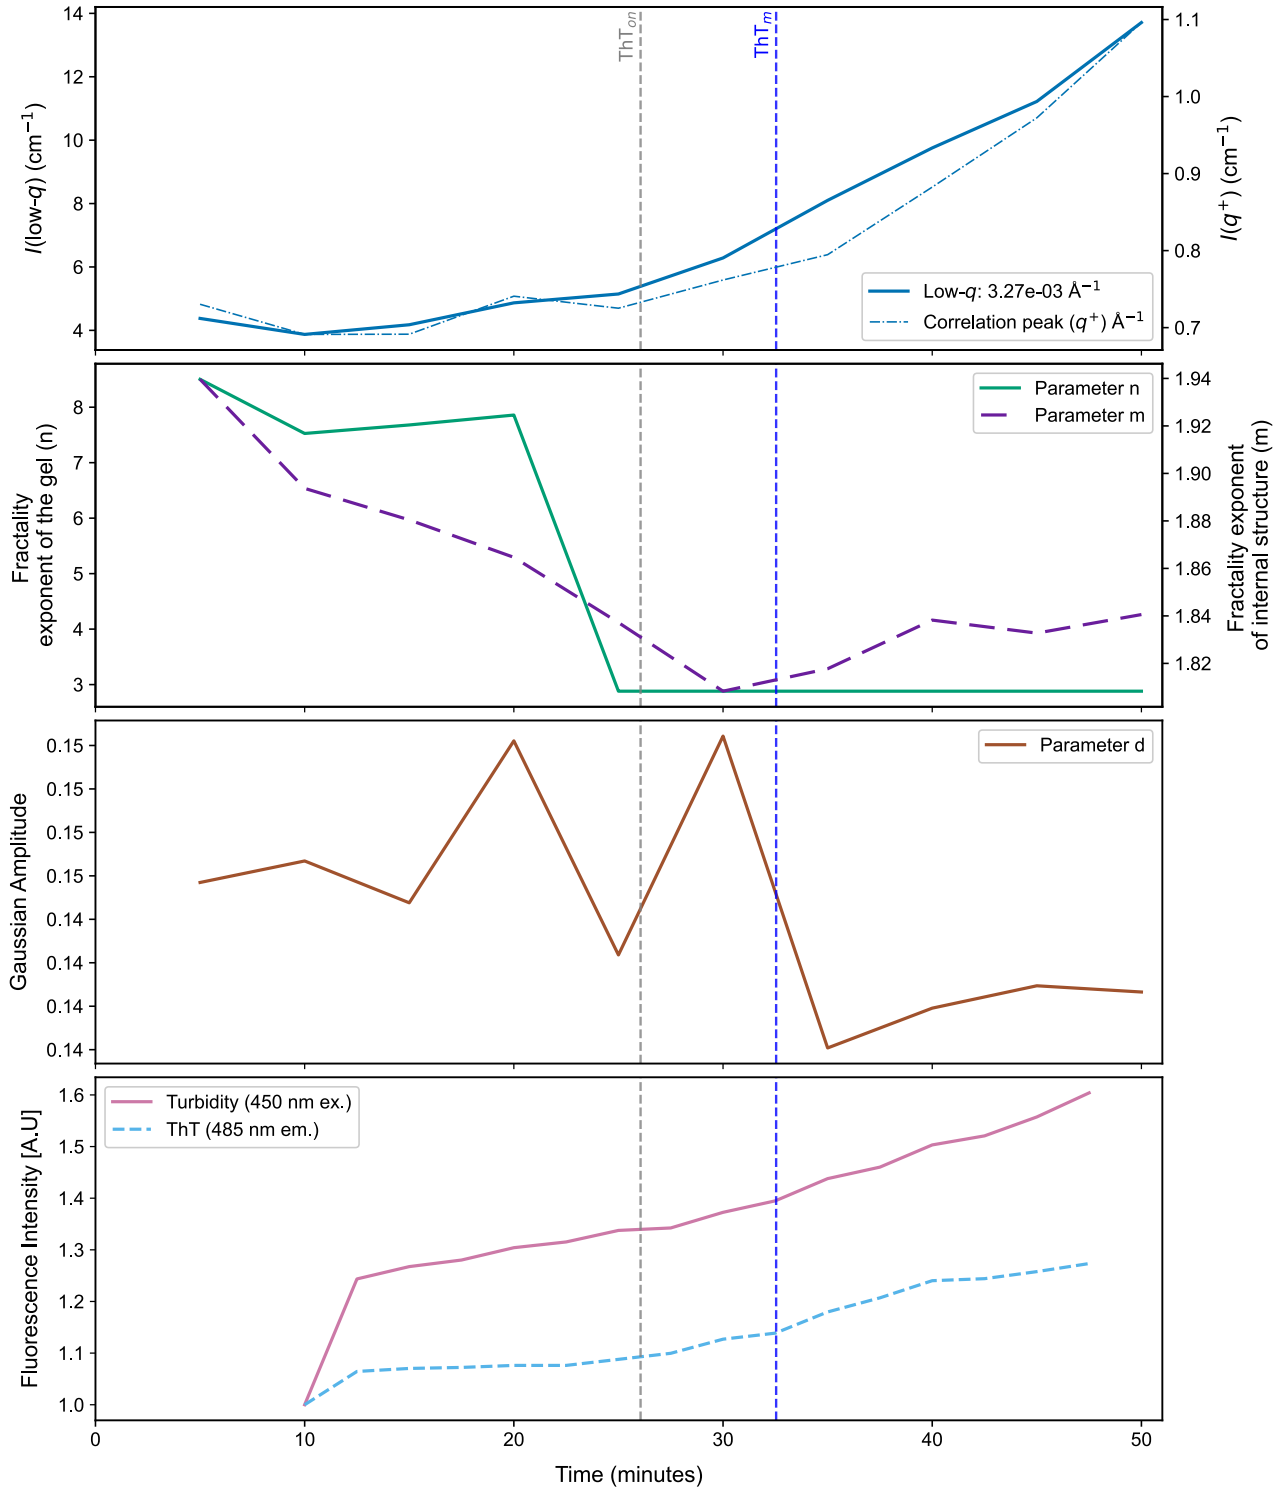

**Figure S17. Time-Resolved NUrF analysis of RSF gelation at 10 mgml<sup>-1</sup> with 15 % (w/v) metahnlol.** Model-free SANS metrics, low- $q$  (blue solid) and the correlation peak  $q^+$  (blue dash) intensities were plotted every 5 min from  $t_{\text{initial}} = 5$  min in the top panel. The middle two panels show structural parameters extracted by fitting the one-step model to each SANS curve: network fractal exponent  $n$  (green), internal-structure exponent  $m$  (purple, dash), and Gaussian amplitude  $d$  (brown). The bottom panel displays pH (purple, dash-dots; offline, every 6 s), turbidity at 450 nm excitation (pink) and ThT fluorescence at 485 nm emission (light-blue dashed; every 2.5 min). Vertical dashed lines mark the ThT onset (ThT<sub>on</sub>, grey) and mid-point (ThT<sub>m</sub>, blue).

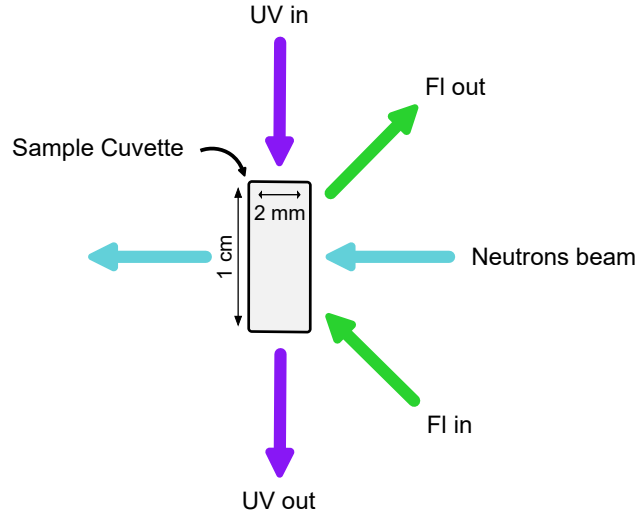

**Figure S18. Schematic of NUrF sample environment alignment.** A 1 cm pathlength, 2 mm optical-width quartz cuvette is centrally positioned for simultaneous multi-modal measurements. The UV excitation beam (purple) enters and exits along the vertical axis (UV in/out), while ThT fluorescence (green) is excited and collected at a 90° angle to the excitation path. A collimated neutron beam (blue) passes horizontally through the cuvette for time-resolved SANS acquisition.

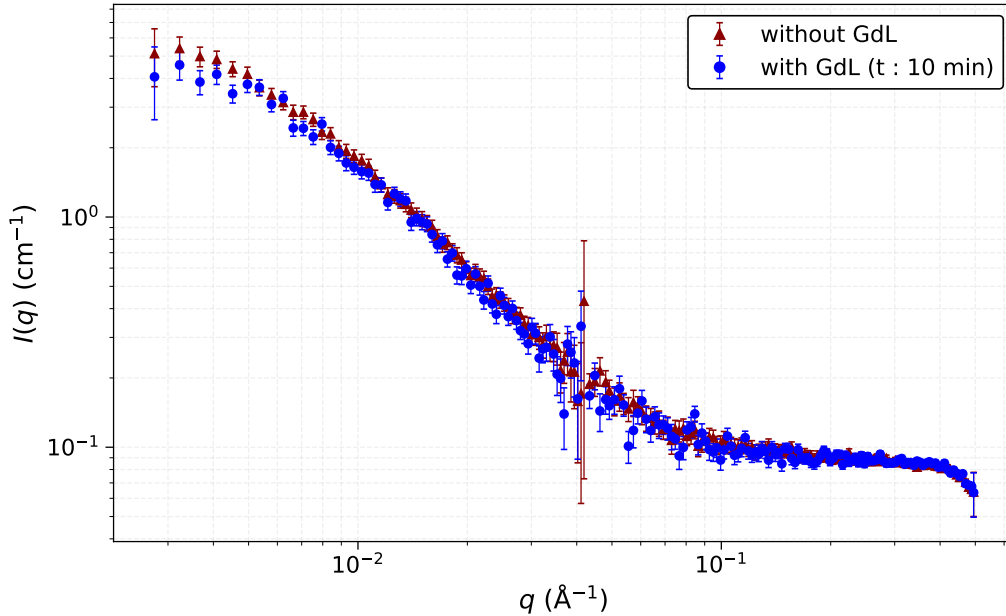

**Figure S19. Normalized SANS scattering intensities of 10 mgml<sup>-1</sup> RSF with and without 1 % (w/v) GdL.** RSF, buffer-exchanged with D<sub>2</sub>O as the solvent without GdL (red, triangle) and the same sample with 1 % GdL at  $t = 10$  min (blue, circle).

### 3 Supplementary Tables

Table 1: Parameters of the two-stage composite scattering model (Eqs. (2)–(3)) and their physical interpretation, with  $d^*$  derived as  $2\pi/q_0$  (not fitted).

| Parameter | Structural meaning                                                      |
|-----------|-------------------------------------------------------------------------|
| $a$       | Amplitude of large-scale scattering                                     |
| $n$       | Gel fractal exponent — network coarseness                               |
| $c$       | Lorentzian amplitude — strength of inter-domain correlations            |
| $\eta$    | Lorentzian correlation length — size of correlated domains              |
| $m$       | Internal fractal exponent — density of internal domains                 |
| $d$       | Gaussian amplitude — magnitude of nanoscale density fluctuations        |
| $q_0$     | Gaussian centre — correlation peak position                             |
| $\sigma$  | Gaussian width — heterogeneity of nanoscale fluctuations                |
| $d^*$     | Inter-domain spacing ( $2\pi/q_0$ ) — periodicity of domain arrangement |
| $b$       | Constant background — incoherent scattering                             |

## References

- [1] Zuo, B., Dai, L. & Wu, Z. Analysis of structure and properties of biodegradable regenerated silk fibroin fibers. *Journal of Materials Science* **41**, 3357–3361 (2006).
- [2] Chen, X., Shao, Z., Knight, D. & Vollrath, F. Conformation transition kinetics of bombyx mori silk protein. *Proteins: Structure, Function, and Bioinformatics* **68**, 223–231 (2007).
- [3] Mikkelsen, K. & Nielsen, S. O. Acidity measurements with the glass electrode in ho-do mixtures. *The Journal of Physical Chemistry* **64**, 632–637 (1960).
- [4] Gade Malmos, K. *et al.* ThT 101: a primer on the use of thioflavin T to investigate amyloid formation. *Amyloid* **24**, 1–16 (2017).
- [5] Xue, C., Lin, T. Y., Chang, D. & Guo, Z. Thioflavin T as an amyloid dye: Fibril quantification, optimal concentration and effect on aggregation. *Royal Society Open Science* **4**, 160696 (2017).
- [6] Dicko, C. *et al.* Nurf—optimization of in situ uv-vis and fluorescence and autonomous characterization techniques with small-angle neutron scattering instrumentation. *Rev. Sci. Instrum.* **91**, 075111 (2020).
- [7] Dewhurst, C. Grasp: Generalized reduced angle scattering program (2020). Version 9.0.
- [8] Jaumot, J., de Juan, A. & Tauler, R. MCR-ALS GUI 2.0: New features and applications. *Chemometrics and Intelligent Laboratory Systems* **140**, 1–12 (2015).
- [9] Tauler, R., Maeder, M. & Juan, A. D. Multiset Data Analysis : Extended Multivariate Curve Resolution. In Tauler, R., Walczak, B. & Brown, S. (eds.) *Comprehensive Chemometrics*, chap. 2.24, 473–505 (Elsevier, 2009).
